# Supplementary material
Source: publisher figshare collection journal article supplement (https://frontiersin.figshare.com/ndownloader/files/24754595)
Supplement: Supplementary file 1 [file 24754595]

## Sheet: suppl table 4 teeth
	DP1-F	DP1-M	P2-F	P2-M	P3-F	P3-M	P4-F	P4-M	M1-F	M1-M	M2-F	M2-M	M3-F	M3-M	DP1-M3-F	DP1-M3-M	DP1-P4-F	DP1-P4-M	M1-M3-F	M1-M3-M	dp1-F	dp1-M	p2-F	p2-M	p3-F	p3-M	p4-F	p4-M	m1-F	m1-M	m2-F	m2-M	m3-F	m3-M	p2-m3-F	p2-m3-M	p2-p4-F	p2-p4-M	m1-m3-F	m1-m3-M	i2L-F	i2L-M	i2W-F	i2W-M	I1L-F	I1L-M
S700014					35		38		46		46																														47		25
S700015																																										81		31		32
S700018		23		31		36		38		49		51		48		229		116		123		14		24		32		33				36		43		219		101		120		113
SGM069						42		44		52		52				279		138		141																257		128		136		53.4				33.5
44-14		26		34		38		40		46		50		49		270		136		139						36		36		40				47						134		93
44-15								43		50		53				269		143		132				26		32		32		34		38		38		233		109		128		92				35
44-16	31		33		39		39		44		50												26		34		35		40		40		43								27		26
44-32	14		30		45		38		45		50		45		250.2		119.7		132.4				23		32		36		40		42		41		215.5		89.6		122		26
44-33						36		42		46		52		49						137				27		36		39		39		42		44		230		102		129
44-34	19		26		32		37		38		48		47		244		126		118				28		33		38		40		43		45		218		98		122		20				17.9
44-56	27		33		36		40		49		50		48		258		129		136		17		29		33		36		42		41		41		238		117		124
44-57	27		34		38		41		50		50		49		260		129		134				29		34		35		40				42		257		109		149		25		28
44-58		26		32		33		38		47		50		49		243		121		128				27		31		38		39		38		38		219		103		118		92		52		36
44-59																																										50		35
44-60		24		39		40		43		50		50		49		270		137		142				33		35		36		43		43		36		246		115		137		82.6		30		31
44-61				35		37		41		50		50				265		133		141		15		28		33		36		41		42		36		139		114		122
44-62	25		31		34		37		41		51		51		251		124		133				30		30		33		38		40		42						128		23		26
44-66		24		32		32		37		42		49		48		251		124		128		20		33		35		38		41		41		46		249		121		129						33
44-67	23		29		37		39		45		52		50		233		119		121
44-68	27		34		42		44		50		54		52		277		140		144		18		33		38		39		42		44		43		261		124		132		42		28		24
44-69	25		29		33		37		37		47		50		229		112		116
44-121	19		30		36		39		43		46		45		232		115		120				26		34		35		40		40		43		209		95		117		28				17
44-125	24		32		36		36		40		52		50		272		131		142				30		36		36		41				41		255		117		138		35		22
44-126															272		136		144																						25		14		22.7
44-127		26		35		38		41		48		51		50		279		139		142				32		35		35		45		43		45		252		118		133		102		56
